# Supplementary material for: Alginic Acid Polymer-Hydroxyapatite Composites for Bone Tissue Engineering
Source: MDPI journal article supplement (doi:10.3390/polym13183070), 2021-09-11
Supplement: s1 [file s1]

Supplementary Information

# Alginic acid polymer-hydroxyapatite composites for bone tissue engineering

Rebecca Sikkema, Blanca Keohan and Igor Zhitomirsky\*

Department of Materials Science and Engineering, McMaster University, Hamilton, ON L8S4L7, Canada; sikkemar@mcmaster.ca (R.S.); keohanb@mcmaster.ca (B.K.)

\*Correspondence: zhitom@mcmaster.ca (I.Z.)

**Citation:** Sikkema, R.; Keohan, B.; Zhitomirsky, I. Alginic acid polymer-hydroxyapatite composites for bone tissue engineering. *Polymers* **2021**, *13*, 3070.  
<https://doi.org/10.3390/polym13183070>

Academic Editor: Firstname Last-name

**Publisher's Note:** MDPI stays neutral with regard to jurisdictional claims in published maps and institutional affiliations.

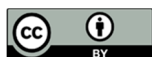

**Copyright:** © 2021 by the authors. Licensee MDPI, Basel, Switzerland. This article is an open access article distributed under the terms and conditions of the Creative Commons Attribution (CC BY) license (<http://creativecommons.org/licenses/by/4.0/>).

**Table S1.** Applications of ALGH-HAP composites

| Composite | Performance                                                                  | Reference |
|-----------|------------------------------------------------------------------------------|-----------|
| Coating   | Improved coating stability and bioactivity                                   | [21]      |
| Coating   | Improved mechanical properties and corrosion protection                      | [35]      |
| Film      | Enhanced mechanical and antibacterial properties, reduced water permeability | [45]      |
| Film      | Enhanced bioactivity                                                         | [50]      |
| Film      | Improved MC3T3 cell adhesion and proliferation                               | [51]      |
| Film      | Improved drug delivery and bone defect healing properties                    | [53]      |
| Scaffold  | Enhanced mechanical properties and improved bone healing                     | [54]      |
| Scaffold  | Enhanced mechanical properties and biocompatibility                          | [55]      |
| Scaffold  | Improved porosity and biocompatibility                                       | [61]      |
| Scaffold  | Enhanced biocompatibility                                                    | [65]      |
| Scaffold  | Enhanced biocompatibility and improved microstructure                        | [66]      |
| Scaffold  | Enhanced biocompatibility                                                    | [67]      |
| Scaffold  | Enhanced bone repair                                                         | [68]      |

|          |                                                                         |       |
|----------|-------------------------------------------------------------------------|-------|
| Scaffold | Reduced HAP agglomeration, improved microstructure and biocompatibility | [69]  |
| Scaffold | Improved injectability for repair of bone defects                       | [70]  |
| Scaffold | Reduced swelling                                                        | [71]  |
| Scaffold | Reduced degradation rate                                                | [72]  |
| Scaffold | Enhanced cell adhesion                                                  | [78]  |
| Scaffold | Optimized porosity and improved biocompatibility                        | [83]  |
| Scaffold | Enhanced cell adhesion                                                  | [84]  |
| Scaffold | Improved biocompatibility and cell adhesion                             | [86]  |
| Scaffold | Improved and optimized microstructure                                   | [88]  |
| Scaffold | Enhanced cells proliferation                                            | [91]  |
| Scaffold | Enhanced porosity control, improved biocompatibility                    | [94]  |
| Scaffold | Advanced drug delivery properties                                       | [95]  |
| Scaffold | Enhanced bone regeneration properties                                   | [96]  |
| Scaffold | Controlled loading of proteins                                          | [97]  |
| Scaffold | Controlled release of antibiotics                                       | [98]  |
| Scaffold | Enhanced compressive strength and cell proliferation                    | [99]  |
| Scaffold | Improved microstructure and cell proliferation                          | [100] |

---

|           |                                                     |       |
|-----------|-----------------------------------------------------|-------|
| Scaffold  | Enhanced bone tissue regeneration                   | [101] |
| Scaffold  | Enhanced antibacterial properties                   | [102] |
| Scaffold  | Controlled drug release                             | [103] |
| Scaffold  | Improved morphology control                         | [104] |
| Scaffold  | Improved bone regeneration properties               | [105] |
| Scaffold  | Improved articular cartilage repair                 | [107] |
| Scaffold  | Optimized microstructure promoting cell growth      | [109] |
| Biocement | Enhanced mechanical properties and biocompatibility | [110] |
| Biocement | Enhanced mechanical properties and biocompatibility | [111] |
| Biocement | Enhanced osteoconductivity and bioresorbability     | [113] |
| Biocement | Enhanced mechanical properties                      | [114] |
| Biocement | Enhanced mechanical properties and cohesion         | [115] |
| Biocement | Enhanced mechanical properties and cohesion         | [116] |
| Biocement | Drug delivery properties                            | [118] |

---

---

|           |                                                              |       |
|-----------|--------------------------------------------------------------|-------|
| Biocement | Drug delivery properties                                     | [119] |
| Biocement | Increased compressive strength and cohesion                  | [122] |
| Biocement | Shortened setting time and improved the anti-washout ability | [125] |
| Gel       | Enhanced mechanical properties                               | [126] |
| Gel       | Enhanced biocompatibility and mechanical properties          | [127] |
| Gel       | Drug delivery properties                                     | [129] |
| Gel       | Drug delivery properties                                     | [130] |
| Gel       | Drug delivery properties                                     | [131] |
| Gel       | Enhanced mechanical properties                               | [133] |
| Gel       | Antibacterial properties                                     | [134] |
| Beads     | Improved biocompatibility                                    | [136] |
| Beads     | Improved biocompatibility                                    | [137] |
| Beads     | Drug delivery properties                                     | [138] |
| Beads     | Drug delivery properties                                     | [139] |
| Beads     | Drug delivery properties                                     | [140] |

---

---

---
